# Supplementary material for: Cellulose-based bioactive material and turmeric-impregnated flexible and biocompatible scaffold for bone tissue engineering applications
Source: Royal Society of Chemistry journal article supplement (doi:10.1039/d4tb02028f), 2025-01-01
Supplement: d4tb02028f1.pdf [file d4tb02028f1.pdf]

## Supporting Information

# Cellulose-based bioactive material and turmeric impregnated flexible and biocompatible scaffold for bone tissue engineering application

Shital S. Shendage,<sup>a</sup> Kranti Kachare,<sup>a</sup> Kajal Gaikwad,<sup>b</sup> Shivaji Kashte,<sup>b</sup> Fu-Der Mai<sup>c</sup>, Anil Vithal Ghule<sup>a,\*</sup>

<sup>a</sup>Green Nanotechnology Laboratory, Department of Chemistry, Shivaji University, Kolhapur 416004, India

<sup>b</sup>Department of Stem Cell and Regenerative Medicine, Centre for Interdisciplinary Research, D. Y. Patil Education Society (Institution Deemed to Be University), Kolhapur, India

<sup>c</sup>Department of Biochemistry and Molecular Cell Biology, School of Medicine, College of Medicine, Taipei Medical University, No. 250, Wuxing St., Taipei 11031, Taiwan

\*Author for correspondence: Anil V. Ghule; avg\_chem@unishivaji.ac.in

## Supporting Information

Supporting Information (5 pages) is available from the RSC Online Library or the author.

**Fig. S1.** a) Synthesis of Tm powder (cleaning, chopping, boiling (for B-Tm), drying, and grinding process) b) UV-visible spectra of the UB-Tm, B-Tm, and commercial Tm. Antibacterial activity of UB-Tm and B-Tm against c) *E. coli* and d) *S. aureus* bacteria.

**Fig. S2.** TGA thermograms of CF, BM-CF, and BM-Tm-CF.

**Fig. S3.** a) Tensile strength study of CF, Tm-CF, BM-CF, and BM-Tm-CF. Images taken during tensile testing b) CF c) Tm-CF d) BM-CF e) BM-Tm-CF.  $n = 3$ ,  $p < 0.05$  at  $*p \leq 0.05$ ,  $**p \leq 0.01$ ,  $***p \leq 0.001$  by one-way analysis of variance (ANOVA) with Dunnet comparison test.

**Fig. S4.** Corresponding angiogenesis images for control, 70S30C BM, CF, Tm-CF, BM-CF, and BM-Tm-CF as a function of time obtained after processing the images using ImageJ software (Mexican Hat Filter).

**Fig. S5.** SEM images of BM-Tm-CF a) and a') before and b) and b') after 14 days of immersion in SBF solution.

**Table S1.** EDS elemental composition of CF, BM-Tm-CF, and BM-Tm-CF after 14 days of bioactivity study in SBF solution.

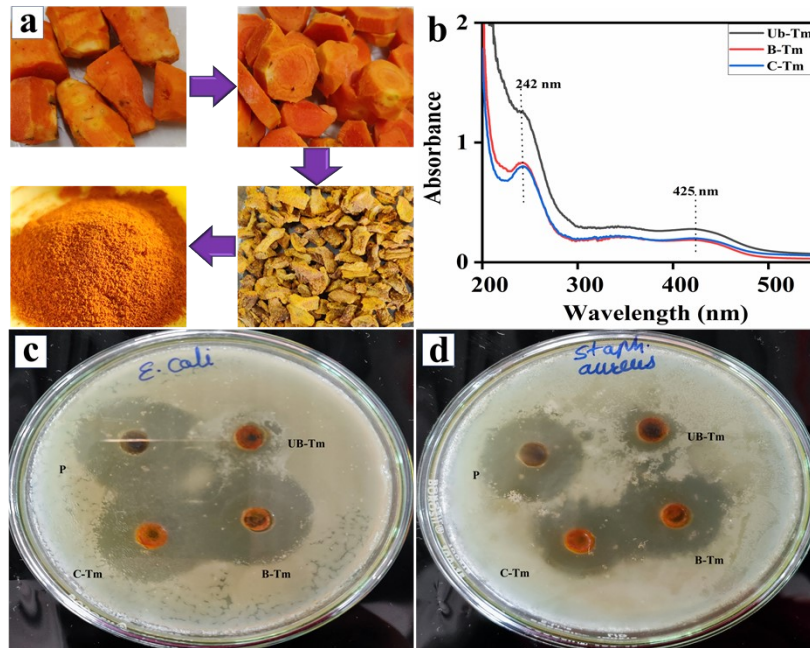

**Fig. S1.** a) Synthesis of Tm powder (cleaning, chopping, boiling (for B-Tm), drying, and grinding process) b) UV-visible spectra of the UB-Tm, B-Tm, and C-Tm. Antibacterial activity of UB-Tm, B-Tm, and C-Tm against c) *E. coli* and d) *S. aureus* bacteria.

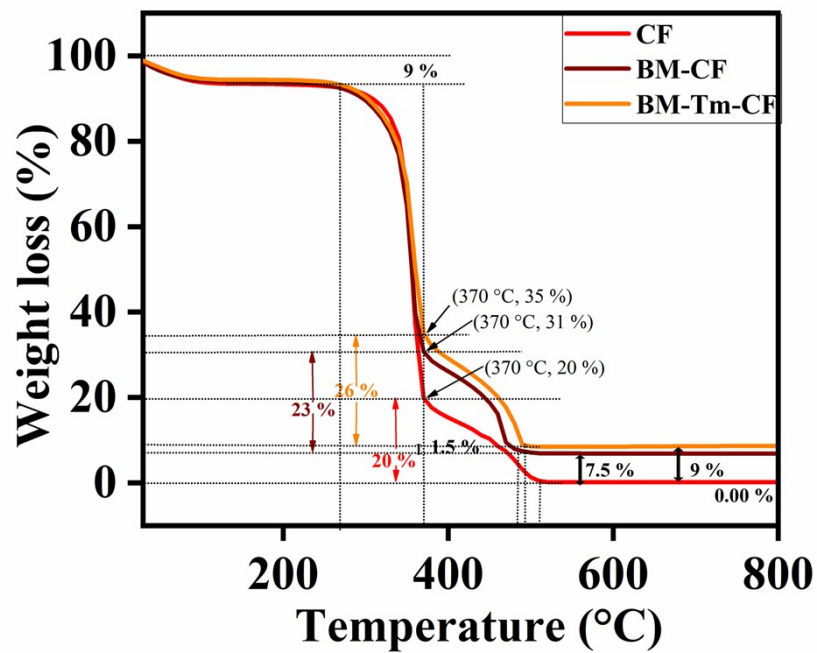

**Fig. S2.** TGA thermograms of CF, BM-CF, and BM-Tm-CF.

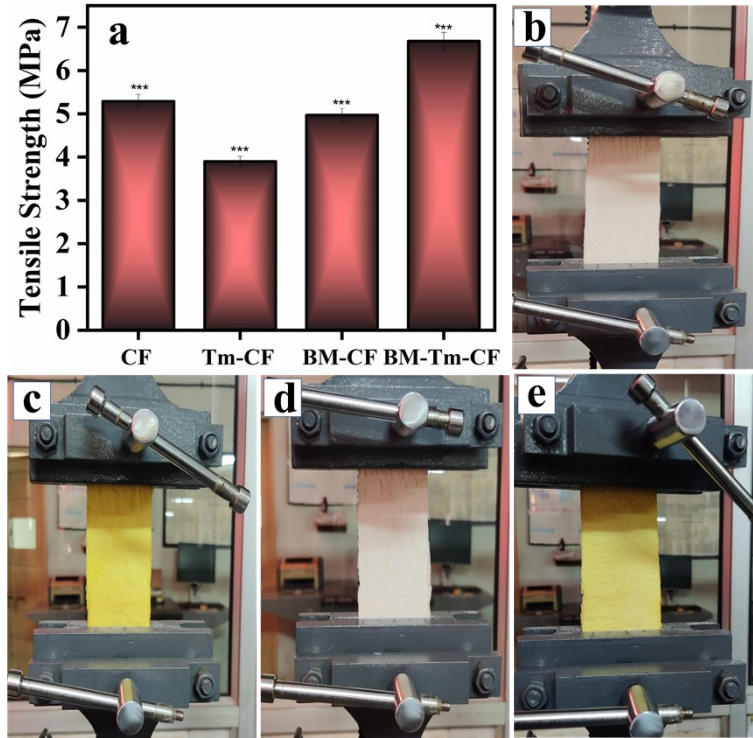

**Fig. S3.** a) Tensile strength study of CF, Tm-CF, BM-CF, and BM-Tm-CF. Images taken during tensile testing b) CF c) Tm-CF d) BM-CF e) BM-Tm-CF.  $n = 3$ ,  $p < 0.05$  at  $*p \leq 0.05$ ,  $**p \leq 0.01$ ,  $***p \leq 0.001$  by one-way analysis of variance (ANOVA) with Dunnett comparison test.

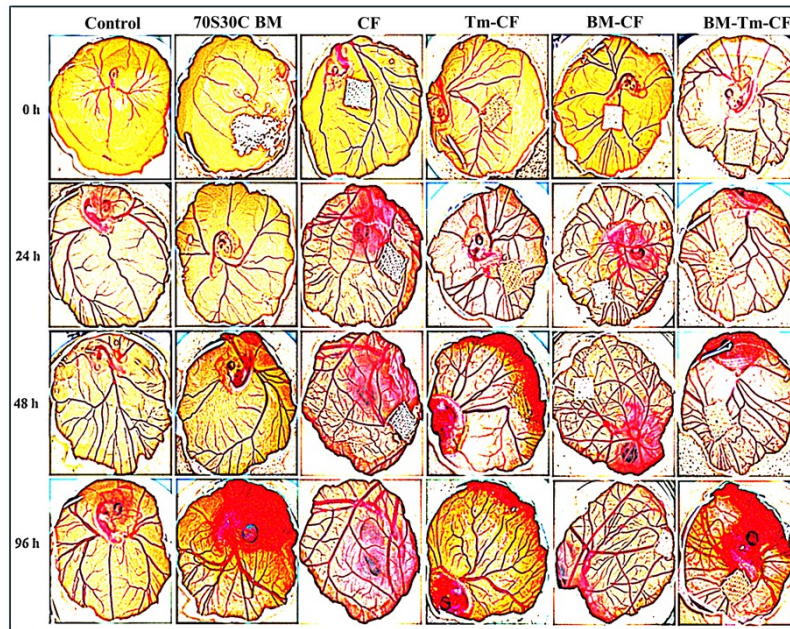

**Fig. S4.** Corresponding angiogenesis images for control, 70S30C BM, CF, Tm-CF, BM-CF, and BM-Tm-CF as a function of time obtained after processing the images using ImageJ software (Mexican Hat Filter).

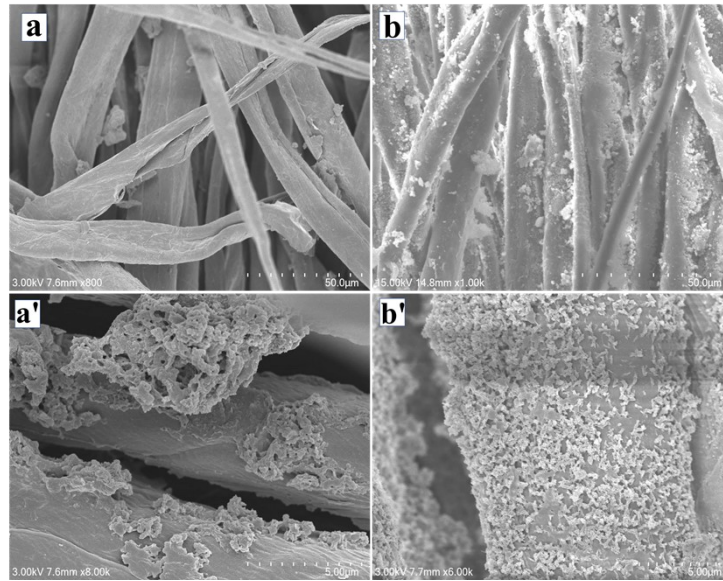

**Fig. S5.** SEM images of BM-Tm-CF a) and a') before and b) and b') after 14 days of immersion in SBF solution.

**Table S1.** EDS elemental composition of CF, BM-Tm-CF, and BM-Tm-CF after 14 days of bioactivity study in SBF solution.

| Element       | CF     |          | BM-Tm-CF |          | BM-Tm-CF (14 days) |          |
|---------------|--------|----------|----------|----------|--------------------|----------|
|               | Wt %   | Atomic % | Wt %     | Atomic % | Wt %               | Atomic % |
| <b>C</b>      | 51.08  | 58.17    | 64.33    | 71.10    | 42.59              | 53.82    |
| <b>O</b>      | 48.92  | 41.83    | 34.18    | 28.31    | 41.70              | 39.56    |
| <b>Na</b>     | --     | --       | 0.21     | 0.12     | 0.20               | 0.13     |
| <b>Si</b>     | --     | --       | 0.29     | 0.14     | 0.20               | 0.11     |
| <b>Ca</b>     | --     | --       | 0.99     | 0.33     | 10.08              | 3.82     |
| <b>P</b>      | --     | --       | --       | --       | 5.24               | 2.57     |
| <b>Total:</b> | 100.00 | 100.00   | 100.00   | 100.00   | 100.00             | 100.00   |
